# Supplementary material
Source: Research Square preprint supplement (doi:10.21203/rs.3.rs-10374411/v1)
Supplement: Supplementary file 1 [file 09d6908b52ab4a6809d00e7f.docx]

**Supplementary Table S1. TRIPOD+AI Reporting Checklist**

Temporal Validation of a Structured Data Transformer Ensemble for 30-Day AMI Readmission Prediction

Reporting standard: Collins GS, Moons KGM, Dhiman P, et al. TRIPOD+AI statement: updated guidance for reporting clinical prediction models that use regression or machine learning methods. BMJ 2024;385:e078378.

| **Item** | **Section** | **Topic** | **Where reported in this manuscript** | **Status** |
| --- | --- | --- | --- | --- |
| 1 | Title and Abstract | Title | Identify the study as developing or validating a multivariable prediction model, the target population, and the outcome to be predicted.  Title page (p. 1): "Temporal Validation of a Structured Data Transformer Ensemble for 30-Day AMI Readmission Prediction." Identifies target population (post-AMI discharge), outcome (30-day readmission), and methodology (validation of a transformer ensemble). | Reported |
| 2 | Title and Abstract | Abstract | Provide a structured summary including background, objectives, study design, setting, participants, sample size, predictors, outcome, statistical analysis methods, results, and conclusions.  Abstract (p. 1). Includes background (data-poor TPA/payer setting), objective (transformer ensemble for AMI readmission), design (retrospective temporal validation), participants (n=5,153), outcome (30-day all-cause readmission), methods (transformer + XGBoost two-stage ensemble), results (AUROC 0.807, CI 0.771-0.838; calibration slope 1.130, intercept 0.441; PPV 46.4%), and conclusion. | Reported |
| 3 | Introduction | Background and rationale | Explain the medical context (including whether diagnostic or prognostic) and the rationale for developing or validating the prediction model, including references to existing models.  Section 1 Introduction (pp. 1-2). HRRP context, prior models (HOSPITAL, LACE, CMS AMI administrative model) with AUC range 0.60-0.72, alert fatigue at 25-35% PPV. Refs 1-12. | Reported |
| 4 | Introduction | Objectives | Specify the objectives, including whether the study describes the development, validation, or update of a model, or a combination of these.  Section 1 Introduction (p. 2). Stated: temporal validation of a transformer-based ensemble (Marqi Index) using deidentified, structured EHR-linked claims under TPA/payer data constraints; benchmarking against incumbent administrative scores. Section 4.1 Reporting and ethics (p. 6) re-states objectives in methods. | Reported |
| 5 | Methods - Source of data | Source of data | Describe the study design or source of data (e.g., randomized trial, cohort, or registry data), separately for development and validation if applicable.  Section 4.2 Data source and cohort (pp. 6-7). Retrospective cohort analysis of deidentified, linked EHR-claims data from TriNetX, LLC. Inclusion criteria, exclusion criteria, and qualifying pool (adults aged ≥40 years at first CVD diagnosis with ≥12 months continuous enrollment) explicitly defined. | Reported |
| 6 | Methods - Source of data | Key study dates | Specify the key study dates, including start of accrual; end of accrual; and, if applicable, end of follow-up.  Section 4.2 Data source and cohort (pp. 6-7). Temporal split anchored at fixed calendar date with training cohort encompassing the chronologically earlier window and temporal-validation cohort the later. Specific accrual and lock dates documented in Methods. | Reported |
| 7 | Methods - Participants | Eligibility criteria | Specify key elements of the study setting, including the country, number and type of centres, and inclusion/exclusion criteria.  Section 4.2 Data source and cohort (pp. 6-7). United States, multi-site deidentified TriNetX research network. Inclusion: adults ≥40 years at first CVD diagnosis with ≥12 months continuous medical and pharmacy enrollment following the index CVD event. Exclusion: active cancer, heart transplant, or end-stage renal disease during the study period. Index event window and follow-up window explicitly defined. | Reported |
| 8 | Methods - Participants | Treatments received | Describe treatments received, especially if relevant to the prediction context.  Treatment-as-feature is captured implicitly via the structured medication, procedure, and encounter histories tokenized into the transformer stage. The model does not condition on a single index treatment because the prediction target is unplanned readmission following any AMI discharge regardless of revascularization strategy. | Reported |
| 9 | Methods - Outcome | Outcome | Clearly define the outcome that is predicted by the model, including how and when assessed.  Section 4.3 Outcome (p. 7). Primary outcome: all-cause unplanned inpatient readmission within 30 calendar days of index AMI discharge. Operationalized via inpatient encounter records in the linked dataset. No competing-risk treatment because all-cause definition. | Reported |
| 10 | Methods - Outcome | Predictors | Clearly define all predictors used in developing the model, including how and when assessed.  Section 4.4 Features and missing data (p. 7) and Section 4.2 Data source and cohort (pp. 6-7) [HIPAA Privacy Rule language]. Structured features only: demographics (age, sex), structured encounter history, diagnosis codes, procedure codes, medication exposure, structured laboratory values where available. No clinical notes, no exact dates, no subregional geography, no facility identifiers, no direct social-determinants fields. Predictor assessment window: preadmission period prior to index AMI discharge. | Reported |
| 11 | Methods - Sample size | Sample size | Explain how the study size was arrived at.  Section 4.2 Data source and cohort (pp. 6-7) and Section 2.1 Cohort (p. 2). n=5,153 AMI patients met all eligibility criteria, with 3,894 in chronologically earlier training cohort (432 events, 11.1%) and 1,259 in temporally held-out validation cohort (177 events, 14.1%). Sample reflects the full eligible population in the TriNetX-derived linked dataset at the freeze date; no a priori power calculation because the study is observational with event-count constraints. | Reported |
| 12 | Methods - Missing data | Missing data | Describe how missing data were handled (e.g., complete-case analysis, single imputation, multiple imputation) with details of any imputation method.  Section 4.4 Features and missing data (p. 7). Missing handling approach reported including the rationale that under the TPA/payer data shape, missingness patterns are themselves informative and were preserved as features where appropriate; explicit imputation strategy documented. Reference 33 (Little and Rubin, Statistical Analysis with Missing Data, 3rd ed.). A bounded tabular missing-data sensitivity analysis comparing iterative/MICE-style numeric imputation (AUROC 0.589) with simple imputation (AUROC 0.594) on the same analytic cohort is reported in Supplementary Section S5; complete-case analysis was infeasible given that 85.7% of patients were missing at least one candidate predictor. This is a bounded tabular check, not a full transformer-pipeline MICE rerun. | Reported |
| 13 | Methods - Analytical methods | Statistical analysis methods | Describe how predictors were handled in the analyses, types of model used, all model-building procedures (including any predictor selection), and the method for internal validation.  Section 4.5 Model architecture and training (pp. 8-9). Two-stage ensemble. Stage 1: transformer model tokenizing preadmission structured-event histories into temporally ordered sequences (EHR-transformer architecture, refs 21-23). Stage 2: XGBoost meta-learner (ref 25). Internal validation via temporal split (training cohort chronologically prior to validation cohort). Hyperparameters reported in Supplementary Table S2. | Reported |
| 14 | Methods - Analytical methods | Type of model and validation | Specify the type of model, all model-building procedures (including any predictor selection), and the method for assessing predictive performance and validation.  Section 4.5 Model architecture and training (pp. 8-9) and Section 4.7 Performance assessment (p. 8). Two-stage ensemble (transformer + XGBoost meta-learner). Performance assessment includes AUROC with bootstrap 95% CI, calibration slope, calibration intercept, integrated calibration index (ICI), decision curve analysis, and operating-threshold classification metrics. Validation method: temporal hold-out. | Reported |
| 15 | Methods - Analytical methods | Risk groups | Provide details on how risk groups were created, if done.  Section 2.3 Classification performance (p. 3) and Section 4.7 Performance assessment (p. 8). Operating threshold (0.254641) reported with sensitivity (36.7%, 95% CI 30.0-44.0), specificity (93.1%, 91.4-94.4), PPV (46.4%, 38.4-54.7), NPV (90.0%, 88.1-91.6). These threshold-dependent metrics (sensitivity, specificity, PPV, NPV, LR+/LR-, F1) are caveated in the Table 3 footnote and Section 3.3 Limitation 1 as optimistically biased because the threshold was selected using the same temporal validation data used to report performance; AUROC and AUPRC are noted as threshold-independent and are not subject to this caveat. Single operating threshold rather than discrete risk groups; net benefit reported across threshold probabilities 0.05-0.30 in Decision Curve Analysis (Section 2.5, p. 3, Figure 4). | Reported |
| 16 | Methods - Analytical methods | Development vs. validation | For validation studies, identify any differences from the development data in setting, eligibility criteria, outcome, or predictors.  Section 4.2 Data source and cohort (pp. 6-7) and Section 2.1 Cohort (p. 2). Temporal validation cohort drawn from the same TriNetX-derived source with identical eligibility criteria, outcome definition, and predictor set as the training cohort. The only difference is the time window (chronologically later). External validation at a partner academic medical center (site anonymized in this submission) is in progress and will be reported in a forthcoming external validation study. | Reported |
| 17 | Methods - AI-specific | AI-specific items: data preprocessing | Describe data preprocessing including tokenization, embedding strategies, and any feature engineering for AI models.  Section 4.5 Model architecture and training (pp. 8-9). Patient histories tokenized into temporally ordered sequences for the transformer stage. Token vocabulary derived from structured encounter, diagnosis, procedure, and medication codes. Stage 2 XGBoost meta-learner consumes transformer-derived embeddings plus engineered tabular features. Full preprocessing pipeline available in Supplementary Note S1. | Reported |
| 18 | Methods - AI-specific | AI-specific items: training procedures | Specify training procedures, hyperparameter tuning, regularization, and computational resources.  Section 4.5 Model architecture and training (pp. 8-9) and Supplementary Table S2. Locked hyperparameters reported including architecture depth, attention heads, embedding dimensions, learning rate, dropout, batch size, training epochs, and ensemble composition. | Reported |
| 19 | Methods - AI-specific | Use of AI tools in development | Disclose any use of generative AI or large language models in the development of the model or manuscript.  Section 4.8 Research-integrity framework and Supplementary Note S1. ChatGPT (GPT-4/4.1, OpenAI) and GitHub Copilot used January 22, 2026, through March 30, 2026, for data extraction, feature engineering, training, and evaluation code; all AI-generated code reviewed line by line by X.S. and E.O. AI-assisted development verification controls and a detected fabrication event are transparently disclosed in S1. | Reported |
| 20 | Results | Participants | Report the flow of participants through the study, including the number eligible and the number used in the analyses.  Section 2.1 Cohort (p. 2) and Figure 1 CONSORT-style participant flow diagram (p. 15). n=5,153 met inclusion criteria; 3,894 training, 1,259 temporal validation. | Reported |
| 21 | Results | Model development and performance | Present the final model with all its components, including weights and an example of how to use it for predictions.  Section 2.2 Discrimination (pp. 2-3), Section 2.3 Classification performance (p. 3), Section 2.4 Calibration (p. 3), Section 2.5 Decision curve analysis (p. 3), Section 2.6 Model progression (p. 3), Table 2 (discrimination), Table 3 (classification), Table 4 (calibration), Table 5 (model progression across development stages), and Figures 2-4. Final model is the two-stage transformer + XGBoost ensemble (the Marqi Index). | Reported |
| 22 | Results | Validation results and calibration | Report performance measures with confidence intervals (e.g., discrimination, calibration) for the prediction model.  Section 2.2 (p. 3): AUROC 0.807 (95% CI 0.771-0.838). Section 2.3 (p. 3): operating-threshold metrics with 95% CIs. Section 2.4 (p. 3): calibration slope 1.130, intercept 0.441, integrated calibration index (ICI). Table 2 (discrimination), Table 4 (calibration), Figure 3 (calibration curve with 95% CI band). Subgroup analyses in Section 2.7 (p. 3), Figure 5 (sex), and Supplementary Figures S6-S7 (age, MI subtype, renumbered from S3-S4). A development-performance sensitivity analysis (out-of-fold AUROC 0.747-0.775 versus locked temporal validation AUROC 0.807) is reported in Supplementary Table S4; this is a development-performance sensitivity check, not a Steyerberg bootstrap-optimism correction. | Reported |
| 23 | Results | Fairness and subgroup analysis | Report performance metrics across relevant subgroups (e.g., demographic groups) and discuss any observed disparities.  Section 2.7 Subgroup analyses (p. 3) and Figure 5 (sex). AUROC by sex: 0.806 (0.754-0.855) male vs. 0.805 (0.755-0.854) female. Age and MI subtype subgroup results in Supplementary Figures S6-S7 with explicit event-count caveats; MI-subtype data available for ~15% of patients, interpretation reported with appropriate caution. | Reported |
| 24 | Discussion | Limitations | Discuss the limitations of the study (including sources of potential bias, statistical uncertainty, and generalizability).  Section 3 Discussion, Limitations subsection (p. 5). Explicitly enumerated: (1) temporal validation used to enhance architecture selection; (2) MI subtype availability ~15%; (3) external generalizability pending a partner academic medical center (site anonymized in this submission) validation; (4) TPA/payer data shape excludes clinical notes and social determinants by design. | Reported |
| 25 | Discussion | Interpretation | Give an overall interpretation of the results, considering objectives, limitations, and results from similar studies and other relevant evidence.  Section 3.1 Principal findings (p. 4) and Section 3.2 Clinical implications and the data ceiling (p. 4). AUROC 0.807 with PPV 46.4% supports targeted post-discharge outreach. Comparison to HOSPITAL, LACE, CMS AMI scores. Discussion of the data ceiling under TPA/payer constraints and the prospective external validation strategy. | Reported |
| 26 | Other information | Supplementary information | Where relevant, provide a link to supplementary information, including the full prediction model (e.g., code, model parameters).  Section 4.8 (p. 9), Code availability statement (p. 10), and Supplementary Materials. Supplementary Note S1 (research-integrity framework and AI-assisted development disclosure). Supplementary Table S2 (hyperparameters). Supplementary Table S3 (bootstrap confidence intervals). Supplementary Table S4 (out-of-fold development-performance sensitivity analysis). Supplementary Section S5 (bounded tabular missing-data sensitivity analysis). Supplementary Figures S6-S7 (subgroup ROC curves, age and MI subtype). OSF pre-registration DOI: 10.17605/OSF.IO/3YVCG. | Reported |
| 27 | Other information | Funding | Give the source of funding and the role of the funders for the present study.  Funding statement (p. 9): "This work was funded by Marqi Medical Inc. No external grant funding supported this study." Competing interests statement (p. 9): X.S. is the founder and CEO of Marqi Medical and holds equity in the company. CRediT author contributions on p. 9. | Reported |

Note. Page numbers correspond to the final manuscript PDF (Marqi_Manuscript_SciRep_071526.pdf, 31 pages). Supplementary materials (Marqi_Supplementary_SciRep_071526.pdf) include: Supplementary Note S1 (research-integrity framework and AI-assisted development disclosure), Supplementary Table S2 (locked hyperparameters), Supplementary Table S3 (bootstrap confidence intervals), Supplementary Table S4 (out-of-fold development-performance sensitivity analysis), Supplementary Section S5 (bounded tabular missing-data sensitivity analysis), and Supplementary Figures S6-S7 (subgroup ROC curves, age and MI subtype). TRIPOD+AI item phrasing adapted from Collins GS et al., BMJ 2024;385:e078378.
