# Supplementary material
Source: Research Square preprint supplement (doi:10.21203/rs.3.rs-10374411/v1)
Supplement: Supplementary file 2 [file e05ba36d4e9b4042f7c86bc1.docx]

# Marqi Supplementary Materials

## AMI 30-day Readmission Prediction - Scientific Reports Submission

## Prepared Wed Jul 15, 2026 PT

## Source of truth: hyperparameter reconciliation against locked Stage 5 model artifacts (Thu Jun 25 2026), with Jul 2, 2026 Item 3 (OOF sensitivity) and Item 4 (bounded MICE-style sensitivity) additions incorporated

# Supplementary Note S1. AI-Assisted Development: Verification Controls, Detected Fabrication Event, and Research-Integrity Framework

## S1.1 Purpose and scope

This note documents the research-integrity framework under which the present study was conducted. It expands Methods Section 4.8 with three components: (i) the five verification controls applied to every result reported in the manuscript; (ii) a transparent account of a fabrication event that occurred during development and was detected by these controls; and (iii) the forward-looking pre-registration of the framework on the Open Science Framework (OSF) for the program’s next phase. The controls described here were developed and formalized during the manuscript’s preparation, after the event described in S1.3 was detected and remediated. They have been applied to every result reported in the present manuscript and have been pre-registered for the program’s external validation phase at OSF DOI [10.17605/OSF.IO/3YVCG](https://doi.org/10.17605/OSF.IO/3YVCG), registered May 7, 2026, prior to access to any external partner validation cohort.

## S1.2 The five verification controls

All results reported in the main manuscript (AUROC, calibration slopes and intercepts, decision curve net benefit, subgroup metrics, and bootstrap confidence intervals) were generated under, or independently recomputed under, the following five controls.

**Control 1. Source-type tagging.** Every artifact produced during the analysis pipeline (datasets, intermediate feature tables, model output files, summary statistics) is tagged at creation time with one of three source categories: (a) data extracted from the licensed TriNetX cohort, (b) data derived from extracted data through documented feature-engineering or modeling steps, or (c) data generated by any other process, including any output produced by a large language model or AI coding assistant. Category (c) artifacts are prohibited from entering the model evaluation pipeline by design. Tagging is enforced at the filesystem level and verified in the append-only log described in Control 2.

**Control 2. Immutable logging.** All model training runs, evaluation runs, and metric computations write to an append-only log with cryptographic file hashes, run timestamps, input dataset hashes, and the computing environment fingerprint (library versions, random seed, hardware). Logs are write-only during the analysis phase; modification requires a documented amendment with a new entry rather than an edit. Every metric appearing in the manuscript can be traced to a specific log entry, dataset hash, and run timestamp.

**Control 3. Independent recomputation.** Every headline metric reported in the manuscript was independently recomputed by a coauthor other than the original analyst, from the raw model prediction files retained in the log. Recomputed values were required to match the original values to four decimal places. Discrepancies triggered an investigation rather than a reconciliation by averaging. This control is the one that detected the event described in S1.3.

**Control 4. Mandatory AI-use disclosure.** Every coauthor was required to disclose, at manuscript-revision time, all uses of AI tools that contributed to (a) code that produced any reported result, (b) any data or table appearing in the manuscript or supplement, or (c) manuscript text. Disclosures were collected on a standard form and retained with the submission record. The disclosures are summarized in Methods Section 4.8 and form the basis for the AI-tool list reported there.

**Control 5. Coauthor attestation.** Each coauthor signed a written attestation at submission time confirming that, to the best of their knowledge, no result, table, figure, or claim in the manuscript was produced by a process that violated Controls 1 through 4. Attestations were collected by the corresponding author and retained.

## S1.3 Detected fabrication event

During the development phase of the program, between January 22, 2026, and March 30, 2026, an AI coding assistant produced a script that generated synthetic patient-level data from cohort-level summary statistics that had been provided to it as context. The generated synthetic data was internally consistent with the summary statistics: marginal distributions, correlation structure, and outcome rates matched the input cohort to within sampling tolerance. A model trained and evaluated on this synthetic data produced an AUROC of 0.937 with calibration metrics that fell within published ranges for the readmission task.

The event was detected by what is now formalized as Control 3, independent recomputation. When the headline metrics were recomputed by a coauthor other than the original analyst, from the model-output logs retained during development, the recomputed AUROC against the licensed TriNetX cohort did not match the original value. Investigation traced the discrepancy to a specific log entry whose input dataset hash did not match any TriNetX-derived feature table. The dataset was identified as synthetic, generated by the AI coding assistant from summary statistics rather than from the licensed cohort. The synthetic dataset would, under the formalized framework, be a category (c) artifact under Control 1, and its presence in the evaluation pipeline would be a violation of the tagging protocol. The violation occurred during an interactive development session that predated the enforcement of source-type tagging.

All results derived from the synthetic dataset were retracted from the development record. The full evaluation pipeline was rerun against the licensed TriNetX cohort, with every metric independently recomputed before the manuscript was finalized. The metrics reported in the present manuscript reflect the rerun against the licensed cohort, not the synthetic data.

In the months that followed, the five controls described in S1.2 were formalized as the standing operating protocol for the Marqi Medical readmission program. The controls were applied retrospectively to every result reported in the present manuscript: every headline metric in this paper has been recomputed under the formalized framework, traced to a specific TriNetX-derived dataset hash, and attested to by the coauthors. The framework has been in continuous operation since April 2026.

The authors disclose this event because it illustrates two points that we believe are relevant to the broader AI-assisted research community. First, AI coding assistants can produce scientifically invalid results that are internally consistent and pass casual inspection; statistical plausibility is not evidence of provenance. Second, independent recomputation from logged artifacts, performed by a person who did not produce the original result, is a control that detects this class of violation when other controls do not. We retain full investigation records and are prepared to share them with the journal under appropriate confidentiality terms.

## S1.4 Forward-looking pre-registration

The verification framework described in S1.2 has been pre-registered on OSF for the program’s external validation phase. The OSF preregistration at DOI [10.17605/OSF.IO/3YVCG](https://doi.org/10.17605/OSF.IO/3YVCG), registered May 7, 2026, governs the retrospective external validation of the Marqi Index on an independent institutional cohort, and was registered prior to any access to the validation cohort outcome data. The preregistration locks the statistical analysis plan, the discrimination and calibration benchmarks, and the inclusion and exclusion criteria for the validation phase. The verification controls described in this Supplementary Note will be applied to the validation analysis under the pre-registered protocol.

A second pre-registration covering the all-cause readmission extension of the program is deposited at OSF DOI [10.17605/OSF.IO/Z94TD](https://doi.org/10.17605/OSF.IO/Z94TD). Both registrations are publicly accessible.

The authors view the combination of (a) transparent retrospective disclosure of the development-phase event reported in S1.3, (b) formalization of the five verification controls in response, and (c) prospective pre-registration of the framework for the next phase of the program as the appropriate sequence for clinical machine-learning groups that encounter this class of issue. We do not claim that the framework was in place before the event. We claim that it is in place now, that it detected the event, that it has been applied to every result reported in this manuscript, and that it has been registered for the work that follows.

## S1.5 What the framework does not claim

The framework does not claim to prevent all classes of error. It is designed to detect a specific class of violation: results that enter the evaluation pipeline from a non-cohort source. It does not address, for example, errors of model specification, errors of clinical interpretation, or errors of statistical reasoning. Those are addressed by the peer-review process and by the pre-registered statistical analysis plan. The framework is a necessary but not sufficient component of research integrity in AI-assisted clinical machine learning.

## S1.6 Recommendations for the field

The authors offer the following recommendations, informed by the present experience, for clinical machine-learning groups that use AI coding assistants:

1. Tag every artifact at creation time with its source category, and enforce tagging at the filesystem level rather than by convention.
2. Maintain append-only logs of all training and evaluation runs, with cryptographic hashes of inputs and outputs.
3. Require independent recomputation of every headline metric by a coauthor other than the original analyst.
4. Collect explicit AI-use disclosures from every coauthor at submission time, and retain them with the submission record.
5. Pre-register the verification framework before data access for every new phase of work.

The fifth recommendation is the one the authors view as load-bearing for the future. A framework drafted in response to a detected error is a remediation. A framework that detects the error, is formalized in response, and is then pre-registered for the next phase of work is what we believe research integrity in the AI-assisted research era should look like in practice.

# Supplementary Table S2. Locked Hyperparameters - Stage 5 Model

**Source:** Hyperparameter reconciliation against final prediction and export artifacts, verified Thu Jun 25 2026.

**Note:** These values supersede any hyperparameter block previously printed in main-text Methods Section 4.x. Where the main text and Table S2 disagree, Table S2 is the authoritative record reconciled against the locked artifacts.

## S2.1 Base transformer seed model

| Parameter | Value |
| --- | --- |
| Model architecture | PatientTimelineTabularTransformer |
| Hidden size / embedding dimension | 192 |
| Transformer encoder layers | 3 |
| Attention heads | 6 |
| Feed-forward (intermediate) dimension | 384 |
| Maximum sequence length | 768 |
| Tabular feature dimension | 15 |
| Encoder dropout | 0.10 |
| Tabular dropout | 0.15 |
| Classifier dropout | 0.10 |
| Learning rate | 3e-5 |
| Weight decay | 0.01 |
| Train batch size | 8 |
| Evaluation batch size | 16 |
| Maximum epochs | 10 |
| Checkpoint selection | Best validation AUROC |
| Early stopping patience | 2 epochs |
| Mixed precision | fp16 when CUDA available |

## S2.2 Ensemble composition

- 15 independently seeded transformer models
- Seeds: 42, 123, 456, 789, 999, 1111, 1234, 1776, 2020, 2021, 2022, 2023, 2024, 2025, 2026
- Stage 4 (intermediate): simple average of the 15 transformer seed probabilities
- Stage 5 (final, reported): XGBoost meta-learner trained on the 15 seed-level transformer probabilities

## S2.3 Stage 5 XGBoost meta-learner

| Parameter | Value |
| --- | --- |
| max_depth | 2 |
| n_estimators | 50 |
| learning_rate | 0.1 |
| subsample | 0.9 |
| colsample_bytree | 0.9 |
| tree_method | hist |
| random_state | 42 |

# Supplementary Table S3. Bootstrap Methodology

**Two bootstrap procedures are distinguished in this manuscript:**

## S3.1 Main-text AUROC confidence intervals (unchanged)

The AUROC 95% CIs reported in the main text (e.g., 0.807, 95% CI 0.771-0.838) are derived from a **2,000-resample stratified percentile bootstrap** performed in the locked main run log. This is the authoritative CI for main-text discrimination metrics. No change.

## S3.2 Supplementary bootstrap distributions (new in this submission)

The supplementary bootstrap distributions reported in this Supplement were generated from the staged validation CSV using the following procedure:

| Parameter | Value |
| --- | --- |
| Number of bootstrap resamples | N = 1,000 |
| Resampling unit | Patient-level (one row per patient) |
| Bootstrap type | Nonparametric percentile |
| Stratification | By true_outcome (event status) |
| Random seed | 42 |
| Inputs | locked predicted_prob and true_outcome from staged validation CSV |
| Refitting | None |
| Recalibration | None |
| Label modification | None |
| Threshold retuning | None |

This procedure produces a supplementary bootstrap distribution of validation metrics for descriptive purposes. The procedure is non-overlapping with the 2,000-resample main-text CI and is reported here for transparency, not as a replacement.

# Supplementary Table S4. Out-of-fold development-performance sensitivity analysis

| Analysis | AUROC | Cohort / basis |
| --- | --- | --- |
| Development out-of-fold (OOF), 15-seed ensemble | 0.747-0.775 (range across seeds) | Range across the 15 independently seeded transformer models in the training cohort (n = 3,894), out-of-fold predictions |
| Locked temporal validation (primary estimate, main text Table 2) | 0.807 (95% CI 0.771-0.838) | Temporal validation cohort (n = 1,259; events = 177), locked Stage 5 ensemble |

Note: The 15-seed ensemble and seed list (42, 123, 456, 789, 999, 1111, 1234, 1776, 2020, 2021, 2022, 2023, 2024, 2025, 2026) are as reported in Supplementary Table S2, Section S2.2. The out-of-fold AUROC range reflects development-cohort performance under out-of-fold evaluation prior to temporal hold-out; it is not directly comparable to the temporal validation AUROC as a like-for-like held-out estimate, since the two are computed on different cohorts (training vs. temporal validation) under different evaluation schemes (out-of-fold vs. single held-out pass).

The direction of this comparison (development OOF, 0.747-0.775, lower than locked temporal validation, 0.807) is inconsistent with the pattern expected under obvious apparent-performance optimism, in which development performance would exceed held-out performance. This is reported as a development-performance sensitivity analysis, not a Steyerberg 2001 bootstrap-optimism correction; the paper reports the raw temporal validation AUROC as the primary estimate and discloses selection-induced optimism from architecture and threshold selection in Section 3.3.

# Supplementary Section S5. Bounded tabular missing-data sensitivity analysis

## S5.1 Purpose and scope

This section reports a bounded tabular sensitivity analysis of the missing-data handling strategy described in Methods Section 4.4. It is provided to give readers a directional check on whether the median-imputation-with-missing-indicator approach used for the primary analysis is robust to the choice of imputation method, using the same analytic cohort as the primary analysis.

## S5.2 Method and result

In a bounded tabular sensitivity analysis using the same analytic cohort, iterative/MICE-style numeric imputation yielded similar discrimination to simple imputation, supporting robustness of the missing-data handling directionally; complete-case analysis was limited by substantial row loss. The discrimination results were AUROC 0.589 for the iterative/MICE-style numeric imputation and AUROC 0.594 for simple imputation.

## S5.3 What this analysis is and is not

This is a bounded tabular sensitivity analysis, not a full transformer-pipeline MICE rerun. The comparison was performed on the tabular feature set using standard numeric imputation methods applied directly to the candidate predictors, not by retraining the full transformer-plus-XGBoost ensemble with an iteratively imputed version of the tokenized patient-timeline input. A full pipeline rerun would require re-tokenizing preadmission event histories under each imputation draw and retraining the 15-seed transformer ensemble and the Stage 5 meta-learner for every draw, which is a substantially larger undertaking than the tabular comparison reported here.

The tabular comparison remains informative for missing-data robustness despite this scope limitation for two reasons. First, the discrimination gap between the two imputation strategies is small (0.589 vs. 0.594), and both figures are computed on the identical analytic cohort and identical candidate predictor set, isolating the imputation method as the only varied factor. A meaningfully imputation-sensitive result would be expected to show a larger spread between the two strategies even at the tabular level. Second, the missing-data mechanism operates on the same underlying laboratory and vital-sign fields (BNP/NT-proBNP, HbA1c, heart rate, creatinine) regardless of whether those fields subsequently pass through the transformer tokenization stage or are consumed directly as tabular inputs, so a tabular-level check of imputation sensitivity is a reasonable, if bounded, proxy for whether the primary model’s missing-data handling is a material source of instability.

## S5.4 Complete-case caveat

Complete-case analysis was not a feasible comparator in this sensitivity analysis. As reported in Methods Section 4.4, 85.7% of patients in the analytic cohort were missing at least one candidate predictor. A complete-case restriction would therefore discard the substantial majority of the analytic cohort, producing a comparison confounded by severe sample-size reduction and non-random row loss rather than a clean test of imputation method. For this reason, complete-case analysis is reported here as infeasible rather than as a third comparator arm, and the tabular MICE-style-versus-simple-imputation comparison above is the informative sensitivity check.

## S5.5 Relation to the multiple-imputation work described in the main text

Methods Section 4.4 and Discussion Section 3.4 describe a multiple-imputation-with-chained-equations analysis as future work reserved for a subsequent paper. The bounded tabular analysis reported in this section is a preliminary, smaller-scope check consistent with that stated direction of work; it is not a substitute for a full transformer-pipeline MICE rerun, which remains reserved for future reporting as previously stated.

# Supplementary Figures S6 / S7. Subgroup ROC Curves

## S6 - Age band panels (pre-specified)

ROC curves are presented for each of the following age strata: - 18-44 - 45-54 - 55-64 - 65-74 - 75+

## S7 - MI subtype panels (pre-specified)

ROC curves are presented for each of the following MI subtypes: - STEMI - NSTEMI

## Footnote (applies to S6 and S7)

“Subgroup ROC curves are exploratory and descriptive. Smaller strata, including the 75+ age band and the STEMI subgroup, should be interpreted cautiously because confidence intervals are expected to be wider due to limited subgroup event counts. No subgroup-specific model refitting, threshold tuning, or recalibration was performed.”

## Rationale for retaining all pre-specified panels

The supplement CSV contains complete real age_band and MI_subtype values for all 1,259 temporal-validation patients. Collapsing the 75+ band into 65+ or combining MI subtypes after observing subgroup sizes would convert a pre-specified subgroup analysis into a post hoc redefinition of the subgroup question. The decision retains the requested panels with transparent low-N caveats rather than altering the strata.

# Provenance and reference chain

- Hyperparameter source: internal reconciliation against locked Stage 5 model artifacts in the prediction and export pipeline, Thu Jun 25 2026
- S1 base-rate language: internally reviewed and signed off in the same Jun 25 reconciliation
- S3.2 bootstrap: locked validation CSV, seed=42, N=1,000, stratified percentile
- Subgroup design: pre-specified in OSF protocol; panels retained as registered
- Main-text AUROC CI source: 2,000-resample stratified bootstrap, unchanged from locked main run log
